# Supplementary material for: Eco-foaming lignin for innovative rigid foam
Source: Royal Society of Chemistry journal article supplement (doi:10.1039/d3gc05123d), 2024-01-01
Supplement: d3gc05123d1.pdf [file d3gc05123d1.pdf]

## Supporting Information

### Eco-foaming Lignin for Innovative Rigid Foams

Qiangui Yan <sup>a</sup>, Timothy Ketelboeter <sup>a</sup>, Wenjun Fan <sup>b</sup>, Caixia Wan <sup>b,\*</sup>, and Zhiyong Cai <sup>a,\*</sup>

<sup>a</sup> Forest Products Laboratory, USDA Forest Service, One Gifford Pinchot Drive, Madison, WI  
53726-2398

<sup>b</sup> Department of Chemical and Biomedical Engineering, University of Missouri, 1406 East  
Rollins Street, Columbia, MO 65211

\*Corresponding authors. Tel: +1 573 884 7882, Email: [wanca@missouri.edu](mailto:wanca@missouri.edu) (Caixia Wan); Tel:  
+1 608-231-9446, Email: [zhiyong.cai@usda.gov](mailto:zhiyong.cai@usda.gov) (Zhiyong Cai).

Numbers of Page: 12

Number of Table: 4

Number of Figure: 4

## Supplementary Results

### Assignment of bands in FTIR spectra of kraft lignin

Lignin contains various types of functional groups depending on lignocellulosic biomass species and isolation methods. Figure S1 shows a representative FTIR spectrum of raw kraft lignin used in the current work, and the assignments of common absorption bands are summarized in Table S1. A broad absorption peak in the range of 3700-3000  $\text{cm}^{-1}$  is attributed to the  $\text{-OH}$  stretching of adsorbed moisture and hydroxyl groups (both phenolic and aliphatic).<sup>1</sup> The bands centered at 2934.8  $\text{cm}^{-1}$  are associated with C-H stretching in methyl ( $\text{-CH}_3$ ) and methylene ( $\text{=CH}_2$ ) groups of the side chains.<sup>2</sup> The bands at 2842.7  $\text{cm}^{-1}$  correspond to the C-H stretching of aromatic methoxy ( $\text{-OCH}_3$ ) group.<sup>1</sup> The sample also shows the characteristic aromatic skeleton (phenylpropane unit) stretching vibrations at 1594.5, 1511.5, 1462.3 and 1426.9  $\text{cm}^{-1}$ ,<sup>3-6</sup> and C-H bending vibration in the side chains of the phenylpropane unit at 1451.2 and 1366.4  $\text{cm}^{-1}$ .<sup>3</sup> Other strong bands include those at 1699.1  $\text{cm}^{-1}$  (C=O stretch, unconjugated ketone, carboxyl, and ester groups), 1265.1  $\text{cm}^{-1}$  (asymmetric aryl ring stretching), 1207.7  $\text{cm}^{-1}$  (asymmetric C-H deformation), 1266  $\text{cm}^{-1}$  (aryl ring breathing), 1142.7  $\text{cm}^{-1}$  (aromatic C-H in-plane deformations in guaiacyl units, secondary alcohols and C-O stretching), 1124.3  $\text{cm}^{-1}$  (aromatic C-H in-plane deformations in guaiacyl units, secondary alcohols and C-O stretching), 1078.1  $\text{cm}^{-1}$  (C-O deformation in secondary alcohols and aliphatic ethers), 1028.9  $\text{cm}^{-1}$  (aromatic C-H in plane deformation), 853.4  $\text{cm}^{-1}$  (C-H deformation of out of plane, aromatic ring), and 814.8  $\text{cm}^{-1}$  (C-H deformation of out of plane, aromatic ring).<sup>3</sup>

**Table S1.** Moisture content of kraft lignin dried at different temperatures.

| <b>Drying Temperature (°C)</b> | <b>Moisture Content (wt%)</b> |
|--------------------------------|-------------------------------|
| 25                             | 7.4±0.21                      |
| 50                             | 4.5±0.15                      |
| 75                             | 2.2±0.16                      |
| 100                            | 1.4±0.11                      |
| 125                            | 0.5±0.08                      |
| 150                            | 0                             |

**Table S2.** Assignment of bands in FTIR spectra of kraft lignin

| <b>Bands<br/>(cm<sup>-1</sup>)</b> | <b>Assignment</b>                                                                                          | <b>Ref.</b> |
|------------------------------------|------------------------------------------------------------------------------------------------------------|-------------|
| 3345.9                             | O–H stretch, H-bonded                                                                                      | 1           |
| 2934.8                             | C–H stretch on methyl and methylene groups                                                                 | 2           |
| 2842.7                             | C-H Stretch in methyl and methylene groups                                                                 | 1           |
| 1699.1                             | C=O stretch, unconjugated ketone, carboxyl, and ester groups                                               | 7           |
| 1652.3                             | Bending of H-O-H groups, absorbed water                                                                    | 8           |
| 1594.5                             | Aromatic skeletal vibrations plus C = O stretch                                                            | 3, 6        |
| 1511.5                             | Aromatic skeletal vibrations of lignin and C=O stretching                                                  | 3, 6        |
| 1462.3                             | C-H deformations; asymmetric -CH <sub>3</sub> and -CH <sub>2</sub> - aromatic skeletal vibrations combined | 5           |
| 1451.2                             | C-H deformations; asymmetric -CH <sub>3</sub> and -CH <sub>2</sub> -                                       | 3, 9        |
| 1426.9                             | Aromatic skeletal vibration combined with C–H in plane deformation                                         | 3, 5        |
| 1366.4                             | Aliphatic C-H Stretch in CH <sub>3</sub> , not in OMe; phenolic OH                                         | 3           |
| 1265.1                             | Guaiacyl ring vibrations and C-O stretching                                                                | 3           |
| 1207.7                             | C–C, C–O stretching                                                                                        | 3           |
| 1142.7                             | Aromatic C-H in-plane deformations in guaiacyl units and secondary alcohols, and C-O stretching            | 3           |
| 1124.3                             | Aromatic C-H in-plane deformations in guaiacyl units and secondary alcohols and C-O stretching             | 3           |
| 1078.1                             | C-O deformation in secondary alcohols and aliphatic ethers                                                 | 3           |
| 1028.9                             | aromatic C-H in-plane deformation                                                                          | 3, 8        |
| 853.4                              | C–H deformation of out of plane, aromatic ring                                                             | 3           |
| 814.8                              | C–H deformation of out of plane, aromatic ring                                                             | 3           |

**Table S3.** Assignment of the FTIR ( $\nu_{\text{OH}}$ ) bands of kraft lignin

| <b>Wavenumber of bands (<math>\text{cm}^{-1}</math>)</b> | <b>Band assignment</b>                                                    | <b>Ref.</b> |
|----------------------------------------------------------|---------------------------------------------------------------------------|-------------|
| 3602.5                                                   | Weakly hydrogen-bonded water                                              | 6, 9        |
| 3555                                                     | Weakly adsorbed water or intramolecular hydrogen bond in a phenolic group | 4, 10, 11   |
| 3496                                                     | Valence vibration of H-bonded OH groups or moderately H-bonded water      | 12          |
| 3372                                                     | Intramolecular H-bonded -OH stretching                                    | 13          |
| 3280                                                     | -OH intramolecular and intermolecular stretching modes                    | 14          |
| 3149                                                     | Strongly H-bonded water                                                   | 3, 6        |
| 1636                                                     | -OH bending in adsorbed water<br>-OH bending affected by water absorption | 4, 8, 15    |

**Table S4.** Comparison of rigid foams and lignin-based foams\*

| <b>Substrates</b>               | <b>Foams</b>                                                 | <b>Density (g/cm<sup>3</sup>)</b> | <b>Compressive Strength (MPa)</b> | <b>Thermal conductivity (W m<sup>-1</sup> K<sup>-1</sup>)</b> | <b>Ref.</b> |
|---------------------------------|--------------------------------------------------------------|-----------------------------------|-----------------------------------|---------------------------------------------------------------|-------------|
| Lignin-based foam<br>PU foam    | Rigid foam                                                   | 0.519                             | 12.87                             |                                                               | 16          |
| Fly ash, polyurea               | Core material modified by surface coating of 10-40% polyurea | 0.544-0.604                       | 16.83-19.15                       |                                                               | 16          |
| Fly ash, PU                     | Core material impregnated by PU                              | 0.932                             | 31.44                             |                                                               | 16          |
| Expanded polystyrene foam (EPS) |                                                              | 0.562                             | 2.99                              | 0.33                                                          | 17          |
| Polystyrene                     | Rigid cellular polystyrene thermal insulation                | 0.012-0.048                       | 0.035-0.414                       | 0.55-0.76                                                     | 18          |
| PU                              | Rigid cellular PU thermal insulation                         | 0.019-0.048                       | 0.104-0.690                       | 0.81-0.88                                                     | 19          |
| PU, polyisocyanurate            | PU modified polyisocyanurate cellular plastic                |                                   | 6-15                              |                                                               | 20          |
| Low density PU                  | PU foam                                                      |                                   | 0.117                             |                                                               | 21          |
| Lignin, PU                      | 5-30% lignin incorporated PU foam                            | 0.0314-0.0365                     | 0.16-0.18                         | 0.024 - 0.025                                                 | 22          |
| Lignin                          | 100% lignin                                                  | 0.18-0.7                          | 7.3-30.16                         |                                                               | 23          |
| Lignin                          | Flexible PU foam                                             | 0.058-0.095                       | 0.018-0.055 (Modulus)             |                                                               | 24          |
| Lignin, PU                      | PU foam                                                      | 0.042-0.044                       | 0.19-0.30                         | 0.0226-0.0345                                                 | 25          |
| Lignin                          | PU foam                                                      | 0.0339-0.0422                     | 0.102-0.202                       | 0.0233-0.025                                                  | 26          |
| Lignin                          | Rigid PU foam                                                | 0.024-0.030                       | >0.12                             | 0.017-0.030                                                   | 27          |
| Lignin, bio-polyol,             |                                                              | 0.041-0.044                       |                                   | 0.023                                                         | 28          |
| Lignin, polyether polyol        |                                                              | 0.036-0.120                       | 0.09-0.47                         | 0.025-0.027                                                   | 29          |
| Lignin, bio-phenol formaldehyde |                                                              | 0.037-0.038                       | 0.06-1.12                         |                                                               | 30          |

\*PU: polyurethane

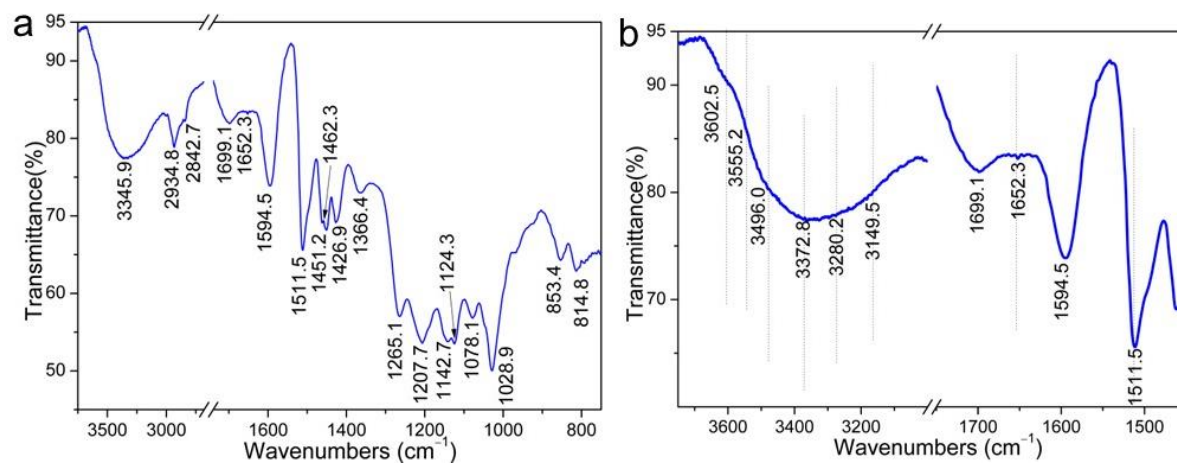

**Figure S1.** Typical Fourier-transform infrared (FTIR) spectra of raw kraft lignin.

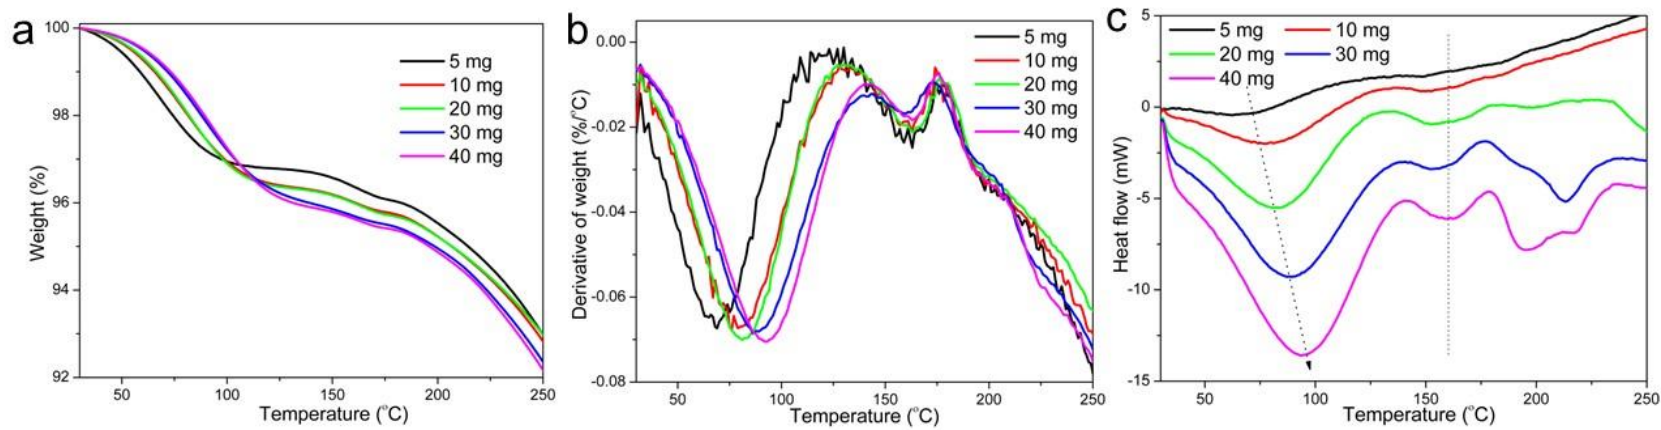

**Figure 2.** Effect of sample size on the thermal properties of kraft lignin sample (KL25) cold-pressed at 300 psi: (a) TG, (b) DTG, and (c) DSC.



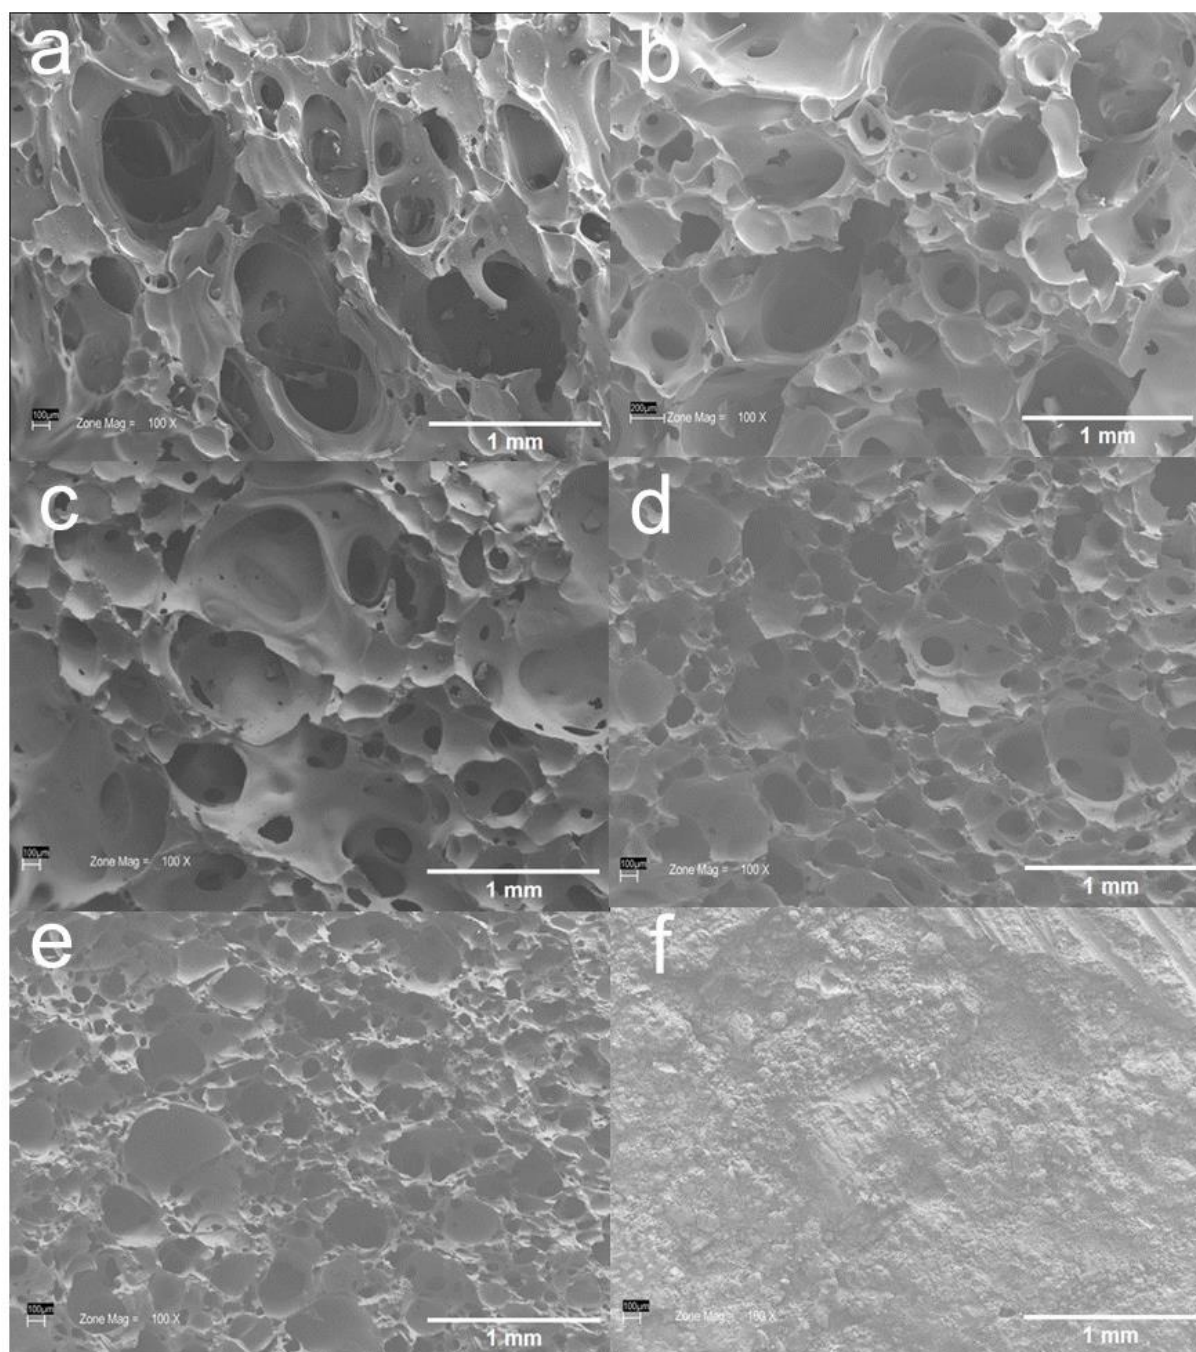

**Figure S3.** SEM images of foam under 100× magnification; (a) LF25, (b) LF50, (c) LF75, (d) LF100, (e) LF125, and (f) LF150.

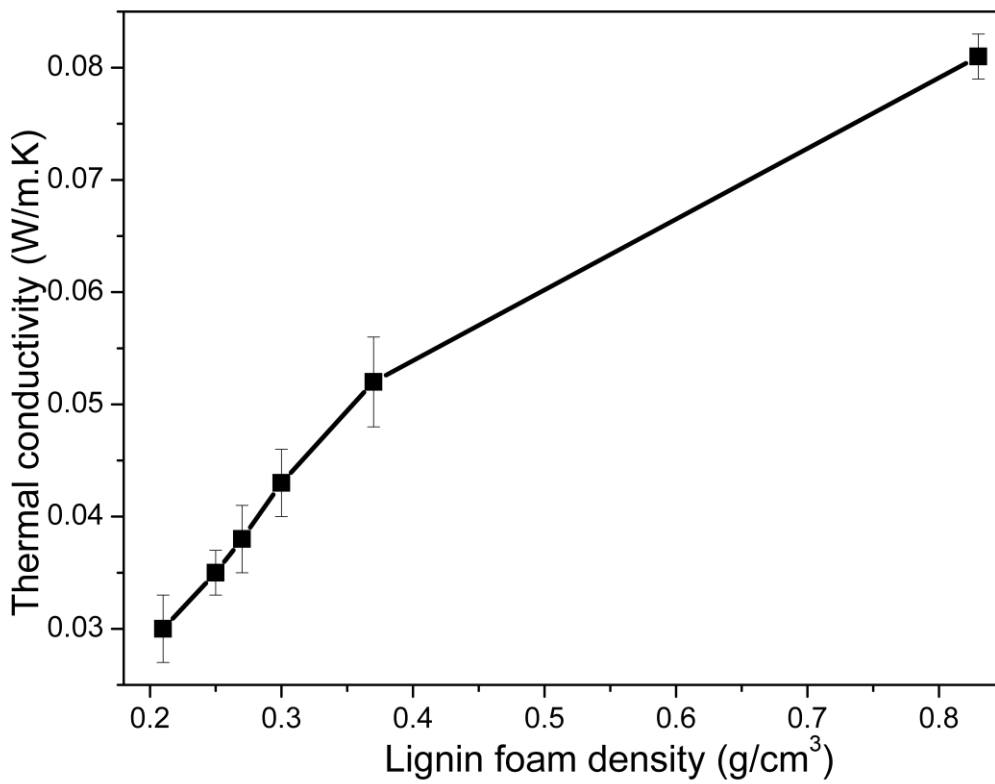

**Figure S4.** Correlation of lignin foam density and thermal conductivity.

## References

1. M. Báder, R. Németh, J. Sandak and A. Sandak, *Cellulose*, 2020, **27**, 6811-6829.
2. S. M. Moosavinejad, M. Madhoushi, M. Vakili and D. J. M. C. y. t. Rasouli, 2019, **21**, 381-392.
3. O. Faix, *Holzforschung*, 1991, **45**, 21-28.
4. X. Guo, Y. Wu and N. Yan, *Wood Sci.*, 2018, **52**, 971-985.
5. N. Gierlinger, L. Goswami, M. Schmidt, I. Burgert, C. Coutand, T. Rogge and M. Schwanninger, *Biomacromolecules*, 2008, **9**, 2194-2201.
6. X. Guo, Y. Wu and N. Yan, *J Wood Science*, 2018, **52**, 971-985.
7. M. Fodil Cherif, D. Trache, N. Brosse, F. Benaliouche and A. F. Tarchoun, *Waste Biomass Valorization*, 2020, **11**, 6541-6553.
8. M. Kačuráková, P. S. Belton, R. H. Wilson, J. Hirsch and A. Ebringerová, *J. Sci. Food Agric.*, 1998, **77**, 38-44.
9. J. R. Scherer, M. K. Go and S. Kint, *J. Phys. Chem.*, 1974, **78**, 1304-1313.
10. A. D. Pouwels, A. Tom, G. B. Eijkel and J. J. Boon, *J. Anal. Appl. Pyrolysis*, 1987, **11**, 417-436.
11. S. Kubo and J. F. Kadla, *Biomacromolecules*, 2005, **6**, 2815-2821.
12. M. Schwanninger, J. Rodrigues, H. Pereira and B. Hinterstoisser, *Vib. Spectrosc.*, 2004, **36**, 23-40.
13. O. Gordobil, R. Herrera, F. Poohphajai, J. Sandak and A. Sandak, *J. Mater. Res. Technol.*, 2021, **12**, 159-169.
14. C.-M. Popescu, G. Singurel, M.-C. Popescu, C. Vasile, D. S. Argyropoulos and S. Willför, *Carbohydr. Polym.*, 2009, **77**, 851-857.
15. J. P. McLean, G. Jin, M. Brennan, M. K. Nieuwoudt and P. J. Harris, *Can. J. For. Res.*, 2014, **44**, 820-830.
16. R. Panduranga, K. Shivakumar and L. Russell, presented in part at the 48th AIAA/ASME/ASCE/AHS/ASC Structures, Structural Dynamics, and Materials Conference, 2007.
17. A. Sariisik and G. Sariisik, *Materials and Structures*, 2012, **45**, 1345-1357.
18. ASTM-C578-23, 2023. Standard specification for rigid, cellular polystyrene thermal insulation.
19. ASTM-C1029-15, 2015. Standard specification for spray-applied rigid cellular polyurethane thermal insulation.
20. A. R. Kakroodi, M. Khazabi, K. Maynard, M. Sain and O.-S. Kwon, *Ind. Crops Prod.*, 2015, **74**, 1-8.
21. M. Mohamed, R. Hussein, A. Abutunis, Z. Huo, K. Chandrashekhara, L. Sneed and Materials, *J. Sandwich Struct. Mater.*, 2016, **18**, 769-789.
22. X. Zhang, Y. Kim, T. L. Eberhardt and R. Shmulsky, *Ind. Crops Prod.*, 2019, **132**, 292-300.
23. Q. Yan, R. Arango, J. Li and Z. Cai, *Mater. Des.*, 2021, **201**, 109460.
24. A. Gondaliya and M. Nejad, *Molecules*, 2021, **26**, 2302.
25. H. Haridevan, M. S. McLaggan, D. A. Evans, D. J. Martin, T. Seaby, Z. Zhang and P. K. Annamalai, *ACS Appl. Polym. Mater.*, 2021, **3**, 3528-3537.
26. X. Zhang, D. Jeremic, Y. Kim, J. Street and R. Shmulsky, *Polymers*, 2018, **10**, 706.

27. H. Haridevan, D. A. Evans, A. J. Ragauskas, D. J. Martin and P. K. Annamalai, *Green Chem.*, 2021, **23**, 8725-8753.
28. M. Kurańska, J. Pinto, K. Salach, M. Barreiro and A. Prociak, *Ind. Crops Prod.*, 2020, **143**, 111882.
29. A. N. Hayati, D. A. C. Evans, B. Laycock, D. J. Martin and P. K. Annamalai, *Ind. Crops Prod.*, 2018, **117**, 149-158.
30. B. Li, Z. Yuan, J. Schmidt and C. C. Xu, *Eur. Polym. J.*, 2019, **111**, 1-10.
